# Supplementary material for: AI-powered bridge defect detection and condition assessment using drone-collected visual data
Source: Research Square preprint supplement (doi:10.21203/rs.3.rs-8002516/v1), 2025-11-18
Supplement: Supplementary file 1 [file dc88a5fdaff225e6d8e35c88.pdf]

## Supplementary Information

### Drone-Based AI for Automated Bridge Defect Detection and Condition Assessment

**Supplementary Table 1.** SMART project Stage 1 Project Service Area<sup>1</sup>

| County   | Population | Community Size | No. of Census Tracts | APP | Population in APP | % Population in APP | # of OA | Population in OA | % Population in OA |
|----------|------------|----------------|----------------------|-----|-------------------|---------------------|---------|------------------|--------------------|
| Sedgwick | 523,824    | Large          | 124                  | 53  | 176,418           | 33.7%               | 9       | 25,301           | 4.8%               |
| Saline   | 54,303     | Midsized       | 12                   | 3   | 12,993            | 23.9%               | 2       | 7,954            | 14.6%              |
| Cowley   | 34,549     | Rural          | 11                   | 4   | 10,606            | 30.7%               | 2       | 7,904            | 22.9%              |
| Cloud    | 9,032      | Rural          | 4                    | 0   | 0                 | 0%                  | 0       | 2,215            | 24.5%              |
| Total    | 621,708    | —              | 151                  | 60  | 200,017           | 32.2%               | 13      | 43,374           | 7.0%               |

Notes: APP = Area of Persistent Poverty; No. = Number, OA = Opportunity Zone

[USDOT Grant Location Verification map](#)

[Community's Opportunity Zones map](#)

**Supplementary Table 2.** Bridge Deficiency and Safety Information within the Project Service Area<sup>2</sup>

| County   | No. of Bridges | No. of Structurally Deficient Bridges | % of Structurally Deficient Bridges | Bridges Not Meeting Traffic Safety Standards |
|----------|----------------|---------------------------------------|-------------------------------------|----------------------------------------------|
| Sedgwick | 1,327          | 46                                    | 3.47%                               | 30.17%                                       |
| Saline   | 371            | 4                                     | 1.08%                               | 51.15%                                       |
| Cowley   | 339            | 21                                    | 6.19%                               | 76.62%                                       |
| Cloud    | 317            | 15                                    | 4.73%                               | 65.06%                                       |
|          | Total = 2,354  | Total = 86                            | Average = 3.87%                     | Average = 55.88%                             |

Notes: No. = Number; % = Percentage

11 **Supplementary Table 3.** Bridge Inventory and Condition Ratings from SMART Stage 1 AI-Based  
 12 Field Inspections

| Bridge                   | LAT 016<br>(deg) | LONG 017<br>(deg) | Age<br>(Yr) | STRUCTURE TYPE<br>043B | DECK<br>COND<br>058 | SUPER-<br>STRUCTURE<br>COND 059 | SUB-<br>STRUCTURE<br>COND 060 | BRIDGE<br>CONDITI<br>ON<br>RATING |
|--------------------------|------------------|-------------------|-------------|------------------------|---------------------|---------------------------------|-------------------------------|-----------------------------------|
| Cowley Co.<br>Bridge#1   | 37.041578        | -96.395720        | 64          | 1                      | 6                   | 6                               | 7                             | F                                 |
| Cowley Co.<br>Bridge#2   | 37.171949        | -97.021492        | 68          | 2                      | 5                   | 5                               | 6                             | F                                 |
| Cowley Co.<br>Bridge#3   | 37.243409        | -96.523818        | 69          | 4                      | 6                   | 7                               | 6                             | G                                 |
| Cowley Co.<br>Bridge#4   | 38.523742        | -97.312357        | 41          | 2                      | 6                   | 7                               | 7                             | G                                 |
| Cowley Co.<br>Bridge#5   | 37.171810        | -96.582653        | 72          | 2                      | 5                   | 6                               | 6                             | F                                 |
| Sedgwick Co.<br>Bridge#1 | 37.52594         | -97.253046        | 72          | 2                      | 4                   | 6                               | 6                             | P                                 |
| Sedgwick Co.<br>Bridge#2 | 37.30107         | -97.461568        | 19          | 1                      | 6                   | 7                               | 5                             | F                                 |
| Sedgwick Co.<br>Bridge#3 | 37.54224         | -97.395552        | 26          | 1                      | 4                   | 6                               | 6                             | P                                 |
| Sedgwick Co.<br>Bridge#4 | 37.47481         | -97.394800        | 26          | 1                      | 4                   | 5                               | 7                             | P                                 |
| Sedgwick Co.<br>Bridge#5 | 37.51215         | -97.232186        | 68          | 2                      | 6                   | 8                               | 7                             | F                                 |
| Saline Co.<br>Bridge#1   | 38.523438        | -97.475464        | 62          | 3                      | 6                   | 7                               | 7                             | F                                 |
| Saline Co.<br>Bridge#2   | 38.433614        | -97.411324        | 27          | 1                      | 7                   | 7                               | 7                             | G                                 |
| Saline Co.<br>Bridge#3   | 38.372852        | -97.363754        | 65          | 4                      | 6                   | 6                               | 6                             | F                                 |
| Saline Co.<br>Bridge#4   | 38.523742        | -97.312357        | 41          | 2                      | 6                   | 6                               | 7                             | F                                 |
| Saline Co.<br>Bridge#5   | 38.544885        | -97.240350        | 40          | 2                      | 7                   | 7                               | 7                             | G                                 |
| Cloud Co.<br>Bridge#1    | 39.312875        | -97.364872        | 56          | 1                      | 7                   | 7                               | 7                             | G                                 |
| Cloud Co.<br>Bridge#2    | 39.595249        | -97.535747        | 5           | 1                      | 8                   | 8                               | 8                             | G                                 |

|                       |           |            |    |   |   |   |   |   |
|-----------------------|-----------|------------|----|---|---|---|---|---|
| Cloud Co.<br>Bridge#3 | 40.000756 | -97.545652 | 42 | 2 | 7 | 7 | 6 | F |
| Cloud Co.<br>Bridge#4 | 39.340070 | -97.542383 | 70 | 2 | 7 | 7 | 7 | G |
| Cloud Co.<br>Bridge#5 | 39.593521 | -97.555539 | 51 | 2 | 7 | 7 | 7 | G |

13

14 **Supplementary Table 4.** Visual Characteristics, Causes, and Examples of Concrete Defects  
15 Considered in the SMART Stage 1 AI Inspection Project

| Type of Defect            | Definition                                                                                                                                 | Causes                                                                                                                                                                                                                                                                                         | Visual examples                                                                     |
|---------------------------|--------------------------------------------------------------------------------------------------------------------------------------------|------------------------------------------------------------------------------------------------------------------------------------------------------------------------------------------------------------------------------------------------------------------------------------------------|-------------------------------------------------------------------------------------|
| Crack                     | Separation or fracture in concrete that may occur before or after hardening, often appearing as visible lines of varying length and depth. | Plastic shrinkage due to rapid water loss, settlement over embedded items, drying shrinkage, thermal contraction, subgrade settlement, overloading, or long-term deterioration from freeze–thaw cycles, alkali–aggregate reactivity, sulfate attack, or reinforcement corrosion <sup>3</sup> . | 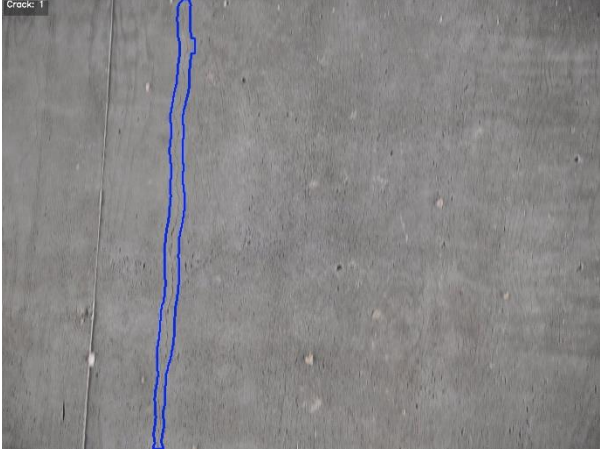 |
| Alligator Cracks (ACrack) | A network of fine, shallow surface cracks forming a chicken-wire or map-like pattern;                                                      | Minor surface shrinkage due to rapid drying, low humidity, high temperature, direct sun, or                                                                                                                                                                                                    |                                                                                     |

|               |                                                                                                                                                                   |                                                                                                                                                                                                                                                          |                                                                                                                                                                             |
|---------------|-------------------------------------------------------------------------------------------------------------------------------------------------------------------|----------------------------------------------------------------------------------------------------------------------------------------------------------------------------------------------------------------------------------------------------------|-----------------------------------------------------------------------------------------------------------------------------------------------------------------------------|
|               | typically cosmetic rather than structural.                                                                                                                        | wind; poor curing practices; or surface treatments (e.g., dry cement dusting) that accelerate drying <sup>3</sup> .                                                                                                                                      |                                                                                           |
| Efflorescence | A whitish crystalline deposit that appears on the surface of concrete, typically soon after construction; usually aesthetic rather than structural <sup>4</sup> . | Migration of soluble salts dissolved in moisture within the concrete to the surface, followed by evaporation of water; influenced by salt content in materials, moisture penetration, and drying conditions (temperature, humidity, wind) <sup>3</sup> . | <br> |

|                                            |                                                                                                                                                                                                     |                                                                                                                                                                                                                                        |                                                                                                                                                                                                                                                                                                                                                                                                                                                                                                                                         |
|--------------------------------------------|-----------------------------------------------------------------------------------------------------------------------------------------------------------------------------------------------------|----------------------------------------------------------------------------------------------------------------------------------------------------------------------------------------------------------------------------------------|-----------------------------------------------------------------------------------------------------------------------------------------------------------------------------------------------------------------------------------------------------------------------------------------------------------------------------------------------------------------------------------------------------------------------------------------------------------------------------------------------------------------------------------------|
| <p>Water-concrete Corrosion (WConccor)</p> | <p>Surface damage to concrete that appears as erosion, abrasion, or general material loss, often presenting as washouts or planar corrosion defects that are visually difficult to distinguish.</p> | <p>Continuous exposure to running water (e.g., at bridge piers or abutment walls), freeze-thaw cycles, chemical attacks (acids, salts), or mechanical abrasion, all of which gradually wear away the concrete surface<sup>5</sup>.</p> |  <p>The top photograph shows a close-up of a concrete surface. A green outline labeled 'WConccor' highlights a large area of surface erosion. A red outline labeled 'Rust' highlights a small area of rusted reinforcement. The bottom photograph shows a concrete pier in a river. A green outline labeled 'WConccor' highlights a large area of surface erosion. A red outline labeled 'Spalling' highlights a small area of spalled concrete.</p> |
| <p>Spalling</p>                            | <p>A deeper surface defect of concrete characterized by localized breaking, flaking, or depression of the surface, often forming circular, oval, or elongated cavities.</p>                         | <p>Internal pressure or expansion within concrete, freeze-thaw cycles, chloride-induced corrosion of reinforcing steel, improper joint design or construction, bond failure, mechanical impact, or fire</p>                            |  <p>The photograph shows a concrete pier with a blue outline labeled 'Spalling' highlighting a large area of spalled concrete. The pier is located in a river with a sandy bank and some vegetation in the background.</p>                                                                                                                                                                                                                          |



|         |                                                                                                                                                        |                                                                                                                                                                                                                                                            |                                                                                      |
|---------|--------------------------------------------------------------------------------------------------------------------------------------------------------|------------------------------------------------------------------------------------------------------------------------------------------------------------------------------------------------------------------------------------------------------------|--------------------------------------------------------------------------------------|
|         |                                                                                                                                                        | and weathering effects <sup>3</sup> .                                                                                                                                                                                                                      |                                                                                      |
| Wetspot | A darker or moist area visible on the concrete surface where water accumulates or fails to drain properly; may indicate potential deterioration zones. | Blocked or damaged drainage, leaky joints, cracks in the deck, or retained water from recent rainfall. Persistent wet areas can accelerate damage by carrying deicing salts and increasing exposure to carbonation and chloride penetration <sup>5</sup> . |    |
| Rust    | A reddish to brownish discoloration on concrete surfaces caused by the oxidation of embedded reinforcement bars or nearby metallic elements.           | Loss of the protective alkaline environment ( $\text{pH} > 9.5$ ) due to carbonation, ingress of water and carbon dioxide through cracks or porous concrete, and chloride attack from deicing salts or marine exposure. These processes                    |  |

|                |                                                                                                                                                                   |                                                                                                                                                                                                                                                                                                                                            |  |
|----------------|-------------------------------------------------------------------------------------------------------------------------------------------------------------------|--------------------------------------------------------------------------------------------------------------------------------------------------------------------------------------------------------------------------------------------------------------------------------------------------------------------------------------------|--|
|                |                                                                                                                                                                   | depassivate the steel, leading to oxidation and rust staining on the surface.                                                                                                                                                                                                                                                              |  |
| Exposed Rebars | Reinforcing steel that has become visible and unprotected due to spalling or loss of concrete cover, leaving it directly exposed to the atmosphere <sup>6</sup> . | Concrete spalling from reinforcement corrosion products, carbonation, or cracking; chloride penetration in coastal or deicing environments ; inadequate cover thickness; and environmental factors (temperature, humidity, marine salts) that accelerate uniform corrosion and mechanical property degradation of the steel <sup>5</sup> . |  |

16

## 17 References

- 18 1. Bureau, U. C. 2020 Census Results. [https://www.census.gov/programs-](https://www.census.gov/programs-surveys/decennial-census/decade/2020/2020-census-results.html)
- 19 surveys/decennial-census/decade/2020/2020-census-results.html.
- 20 2. FHWA. National Bridge Inspection Standards Regulations (NBIS). FHWA-2017-0047;
- 21 2022.

- 22 3. Portland Cement Association. Concrete Slab Surface Defects: Causes, Prevention,  
23 Repair. Portland Cement Association (2001). Available at:  
24 [https://www.concreteisbetter.com/wp-content/uploads/2013/06/Slab-Surface-](https://www.concreteisbetter.com/wp-content/uploads/2013/06/Slab-Surface-Prevention-Repair-a.pdf)  
25 [Prevention-Repair-a.pdf](https://www.concreteisbetter.com/wp-content/uploads/2013/06/Slab-Surface-Prevention-Repair-a.pdf). (accessed 28 October 2025).
- 26 4. International Concrete Repair Institute. Concrete Repair Terminology. International  
27 Concrete Repair Institute (2016). Available at:  
28 <https://www.icri.org/page/repairterminology>. (accessed 28 October 2025).
- 29 5. Flotzinger, J., Rösch, P. J. & Braml, T. dacl10k: Benchmark for Semantic Bridge  
30 Damage Segmentation.
- 31 6. Papadopoulos, M. P., Apostolopoulos, C. A., Zervaki, A. D. & Haidemenopoulos, G.  
32 N. Corrosion of exposed rebars, associated mechanical degradation and correlation  
33 with accelerated corrosion tests. *Constr Build Mater* **25**, 3367–3374 (2011).  
34
